# Supplementary material for: Cytotoxic T cell responses are enhanced by antigen design involving the presentation of MUC1 peptide on cholera toxin B subunit
Source: PubMed Central journal article supplement (PMC4741471; doi:10.18632/oncotarget.5307), 2015-09-21
Supplement: oncotarget-06-34537-s001.pdf [file oncotarget-06-34537-s001.pdf]

## SUPPLEMENTARY FIGURES AND TABLES

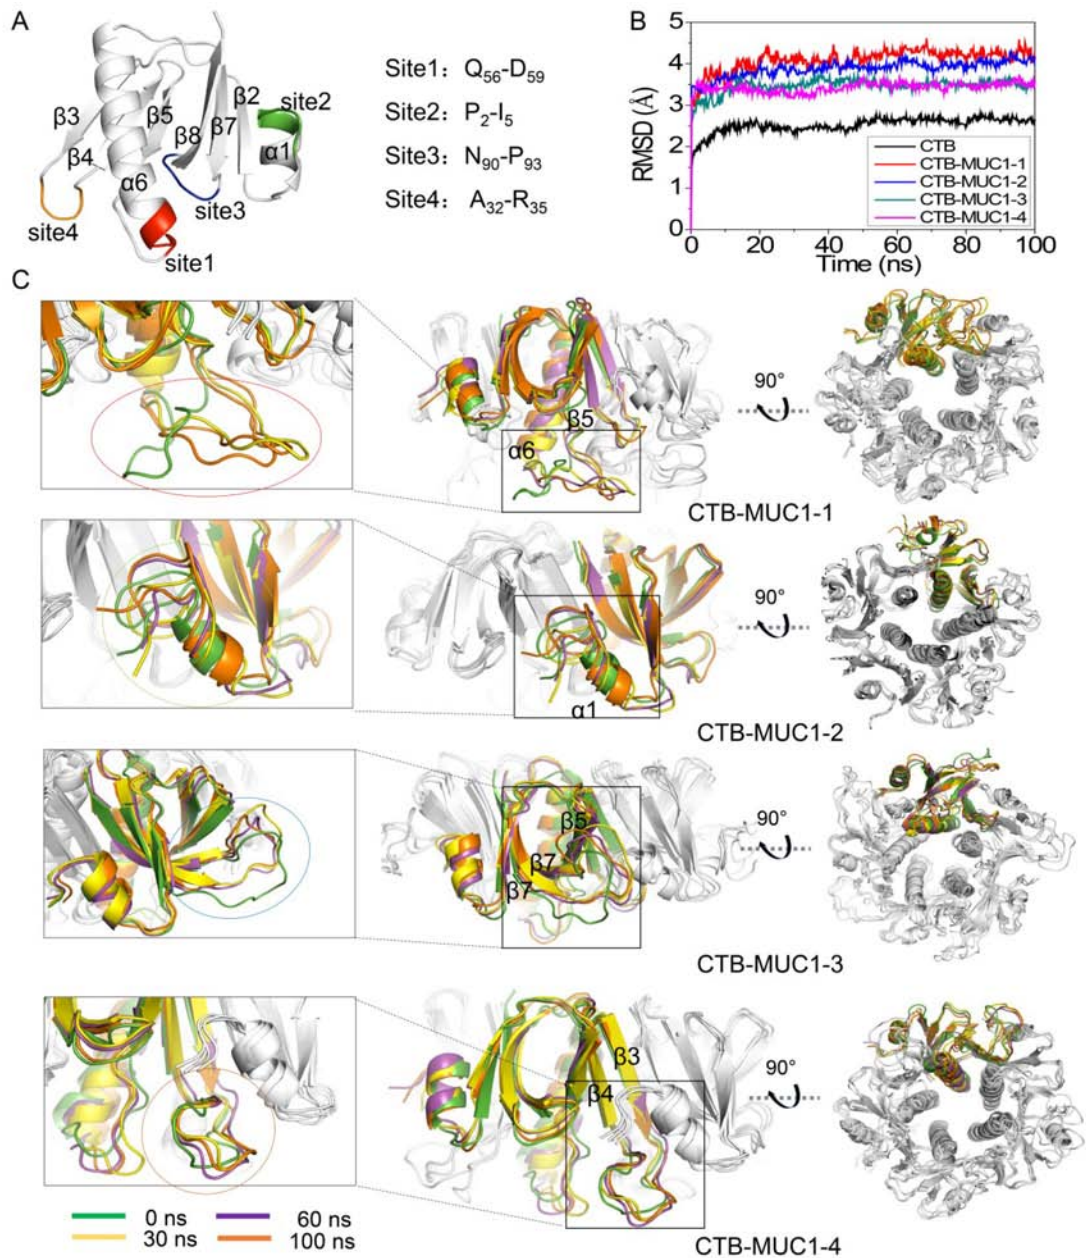

**Supplementary Figure S1: The comparison of the conformations of MUC1 in various positions insertion** **A.** The structure of CTB monomer CTB consists of two  $\alpha$ -helix and six  $\beta$ -sheet. Site 1 to site 4 showed the insertion position. **B.** The RMSD analysis of four hybrid CTB-MUC1. **C.** The structure comparison of four insertions at 0 ns, 30 ns, 60 ns, 100 ns MD simulation. The cycles showed the inserted MUC1 at different positions. The homology models of the four insertions quickly reach the steady state after starting the dynamic simulations. However, MUC1 in the P<sub>2</sub>-I<sub>5</sub> insertion is interfere with CTB pentamer formation. Moreover, MUC1 in the N<sub>90</sub>-P<sub>93</sub> insertion is gradually close to the  $\beta$ 5 chain of a CTB submit and sustained interacting with it during dynamic simulation. N<sub>32</sub>-P<sub>35</sub> insertion site is between  $\beta$ 3 and  $\beta$ 4 chain of a CTB submit. MUC1 in this insertion site gradually formed a rigid loop inside the CTB molecular during dynamic simulation, which is also not good for antigen presentation.

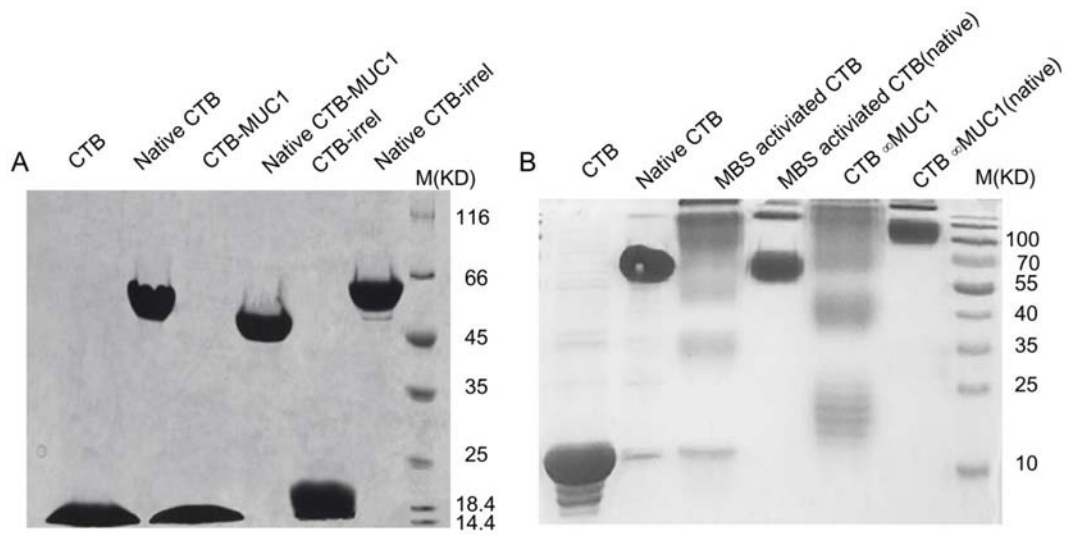

**Supplementary Figure S2: SDS-PAGE analysis of production of recombinant CTB-irrel and CTB<sub>∞</sub>MUC1.** **A.** The purified CTB, CTB-MUC1 and CTB-irrel. **B.** The conjugation of CTB<sub>∞</sub>MUC1.

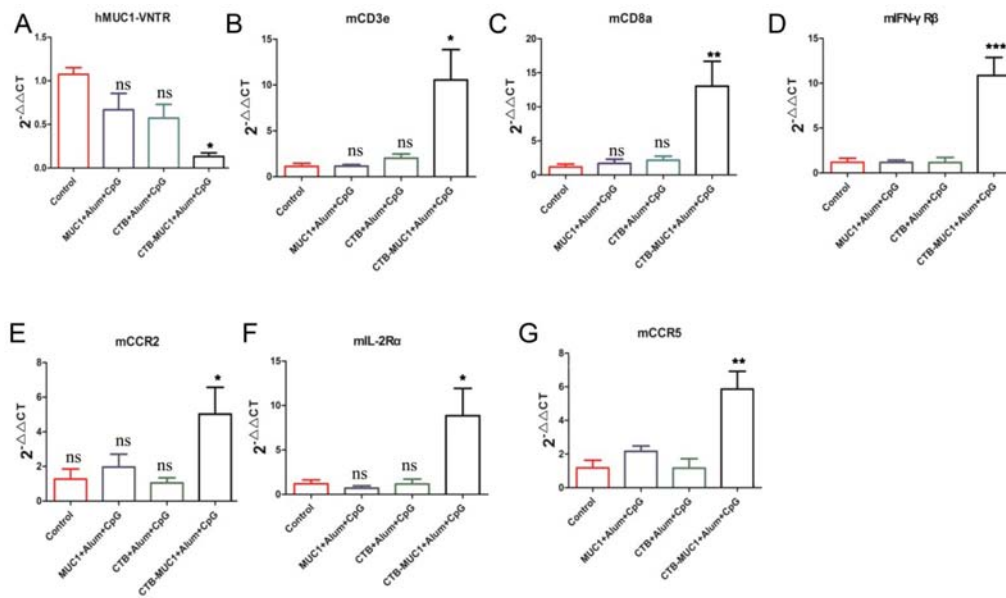

**Supplementary Figure S3: mRNA expression of MUC1, CD3e, and CD8a in tumor tissues from sacrificed mice by quantitative reverse transcription-PCR (qRT-PCR).** Differences between the levels were expressed as fold changes with the  $2^{-\Delta\Delta CT}$  method. **A.** Comparison of the relative MUC1 expression values in tumor tissues from sacrificed mice indifferent immunization groups. **B.** and **C.** Comparison of the relative CD3e and CD8a expression values in tumor tissues from sacrificed mice in different immunization groups. **D., E., F.** and **G.** Comparison of the relative expression of Th1-associated markers IFN $\gamma$ R $\beta$ , CCR2, IL-2R $\alpha$  and CCR5 in sacrificed mice from different immunization groups. ( $r = 3, n = 3$ ).

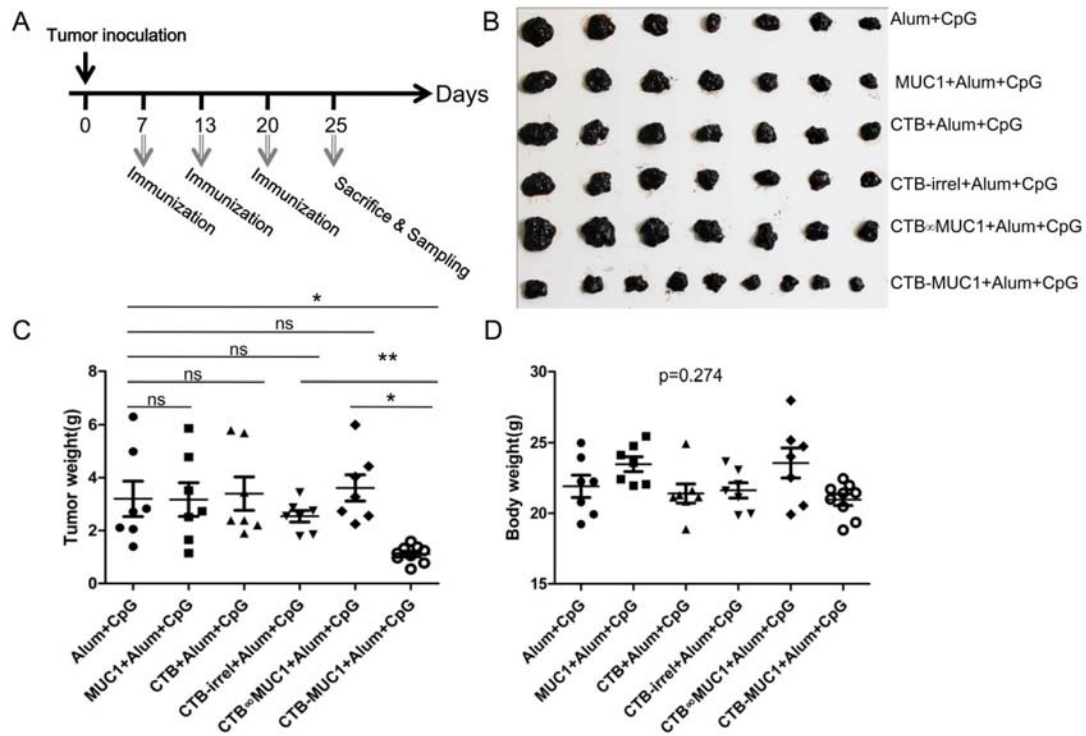

**Supplementary Figure S4: Tumor therapeutic efficacy of CTB-MUC1 on MUC1<sup>+</sup> B16 melanoma-bearing mice.** **A.** Tumor therapy schedule. Mice got 3 immunizations from day 7 after tumor inoculation and about 1 vaccination per week. **B.** After sacrifice, tumors were removed from mice in different groups and photographed. **C.** Weight statistics of separated tumors after sacrifice. Each data point represents an individual mouse and the horizontal lines indicate the mean for the group of mice ( $n = 7-10$ ). **D.** Mice body weight statistics on day 25. Statistical differences were analyzed by one-way ANOVA with Bonferroni's multiple comparison test.

**Supplementary Table S1: Prediction of continuous B-Cell epitopes in CTB**

| Method                                                     | Method Parameters                                                     | Positions: Score of the Top 5 Prediction(peptide length $\geq$ 5AA) |               |                                              |                              |
|------------------------------------------------------------|-----------------------------------------------------------------------|---------------------------------------------------------------------|---------------|----------------------------------------------|------------------------------|
|                                                            |                                                                       | 1-20 Epitope*                                                       | 30-50 Epitope | 50-70 Epitope                                | 70-103 Epitope               |
| Chou and Fasman' s $\beta$ -turn scale                     | Window size 7<br>Minimum: 0.643<br>Maximum: 1.217                     | 1-7: 1.13                                                           |               | 53-59: 1.196<br>54-60: 1.183                 | 88-94: 1.217<br>89-95: 1.174 |
| Emini Surface Accessibility Prediction                     | Window size 6<br>Threshold: 1.000<br>Minimum: 0.136<br>Maximum: 3.587 |                                                                     |               | 58-63: 2.409<br>59-64: 3.672<br>66-71: 3.587 | 88-93: 2.690<br>89-94: 3.482 |
| Bepipred Linear Epitope Prediction                         | Threshold: 0.350<br>Minimum:-0.925<br>Maximum:1.244                   | 1-5                                                                 | 30-34         | 50-63                                        | 91-94                        |
| Kolaskar & Tongaonkar Antigenicity                         | Window size 7<br>Minimum: 0.915<br>Maximum: 1.163                     | 5-12                                                                | 47-60         |                                              | 72-80<br>82-89<br>93-99      |
| Discoptope - Prediction of epitopes from protein structure | Threshold: -7.7<br>PDB NO. 1CHQ                                       |                                                                     | 30-36         | 52-64                                        | 88-92                        |

\* The CTB protein sequence was divided into four parts to identify the location of continuous B-Cell epitopes

**Supplementary Table S2: ELISA anti-MUC1 antibody subtypes and titers after 2 immunizations with various preparations**

| Immunization      | IgG total           | IgG1                | IgG2a(IgG2c)       | IgG2b               | IgG3               | IgM                |
|-------------------|---------------------|---------------------|--------------------|---------------------|--------------------|--------------------|
| CTB-MUC1+Alum     | 100*2 <sup>11</sup> | 100*2 <sup>10</sup> | 100*2 <sup>3</sup> | 100*2 <sup>5</sup>  | 100*2 <sup>4</sup> | 100*2 <sup>7</sup> |
| CTB-MUC1+Alum+CpG | 100*2 <sup>12</sup> | 100*2 <sup>11</sup> | 100*2 <sup>6</sup> | 100*2 <sup>10</sup> | 100*2 <sup>6</sup> | 100*2 <sup>5</sup> |
| CTB+Alum+CpG      | 100*2 <sup>2</sup>  | 100*2               | <100*2             | <100*2              | <100*2             | <100*2             |
| MUC1+Alum+CpG     | 100*2 <sup>11</sup> | 100*2 <sup>10</sup> | 100*2 <sup>3</sup> | 100*2 <sup>4</sup>  | 100*2 <sup>3</sup> | 100*2 <sup>4</sup> |
| MUC1+Alum         | 100*2 <sup>5</sup>  | 100*2 <sup>4</sup>  | 100*2              | 100*2 <sup>3</sup>  | 100*2 <sup>2</sup> | 100*2 <sup>2</sup> |

Anti-MUC1 antibody titers are presented as median values for groups of 12–16 mice. ELISA plates were coated with MUC1<sub>30</sub> for anti-MUC1 antibody titers. Titers were determined by linear regression analysis, with plotting of dilution versus absorbance. Titers are defined as the highest dilution yielding an optical density of 0.1 or greater relative to normal control mouse sera.

**Supplementary Table S3: Primers used in qPCR**

| Primer                      | Sequence(5'-3')       | Gene accessing number |
|-----------------------------|-----------------------|-----------------------|
| mGAPDH-F                    | GCTAGGACTGGATAAGCAGGG | NM_008084.3           |
| mGAPDH-R                    | AATCCGTTACACCGACCTT   |                       |
| hMUC1-VNTR-F                | TCCGGCTCCGGGTTCTA     | NM_001204285.1        |
| hMUC1-VNTR-R                | CAGAGCCGGACGGTTG      |                       |
| mCD3e-F                     | CTGCTACACACCAGCCTCAA  | NM_007648.4           |
| mCD3e-R                     | CATCAGCAAGCCCAGAGTGA  |                       |
| mCD8a-F                     | TCAGTTCTGTCTGCCAGTC   | NM_009915.2           |
| mCD8a-R                     | TCACAGGCGAAGTCCAATCC  |                       |
| mIL-2R $\alpha$ -F          | AACACCACCGATTTCTGGCT  | NM_008367             |
| mIL-2R $\alpha$ -R          | GCTGGCCACTGCTACCTTAT  |                       |
| mCCR2-F                     | CAAGCACTTAGACCAGGCCA  | NM_009915.2           |
| mCCR2-R                     | ACTCGATCTGCTGTCTCCCT  |                       |
| mIFN- $\gamma$ R $\beta$ -F | TCCTCGCCAGACTCGTTTTTC | NM_008338.3           |
| mIFN- $\gamma$ R $\beta$ -R | GGGTCATTGCTGGAAGGTGA  |                       |
| mCCR5-F                     | GTATGTCAGCACCTGCCAA   | NM_009917.5           |
| mCCR5-R                     | GCAGGAAGAGCAGGTCAGAG  |                       |

All the primers were designed to amplify a 100–200bp product unique to template. The T<sub>m</sub> of the primers were set at 57°C–60°C
